# Supplementary material for: Efficacy and Tolerability of Second and Third Generation Anti-epileptic Drugs in Refractory Epilepsy: A Network Meta-Analysis
Source: PubMed Central journal article supplement (PMC5451432; doi:10.1038/s41598-017-02525-2), 2017-05-31

# **Efficacy and Tolerability of Second and Third Generation Anti-epileptic Drugs in Refractory Epilepsy: A Network Meta-Analysis**

**Running title:** A network meta-analysis of trials about AEDs in refractory epilepsy

**Chuanjun Zhuo<sup>1, 2, 3, 4</sup>, Ronghuan Jiang<sup>5</sup>, Gongying Li<sup>3</sup>, Mingjing Shao<sup>6</sup>, Ce Chen<sup>1</sup>, Guangdong Chen<sup>1</sup>, Hongjun Tian<sup>2</sup>, Jie Li<sup>2</sup>, Rong Xue<sup>7\*</sup>, Deguo Jiang<sup>1\*</sup>**

<sup>1</sup>Department of Psychiatry, Wenzhou Seventh People's Hospital, Wenzhou, Zhejiang, 325005, China

<sup>2</sup>Department of Psychiatry, Tianjin Anding Hospital, Tianjin, 300222, China

<sup>3</sup>Institute of Mental Health, Jining Medical University, Jining, Shandong, 272067, China

<sup>4</sup>Department of Psychiatry, Tianjin Anning Hospital, Tianjin, 300222, China

<sup>5</sup>Department of Psychological Medicine, Chinese PLA (People's Liberation Army) General Hospital, Chinese PLA (People's Liberation Army) Medical School, Beijing, 100853, China

<sup>6</sup>Department of Cardiology, China-Japan Friendship Hospital, Beijing, 100029, China

<sup>7</sup>Department of Neurology, Tianjin Medical University General Hospital, Tianjin, 300052, China

**Corresponding to:** Rong Xue, Department of neurology, Tianjin Medical University General Hospital, No.154 Anshan Road, Peace Street, Tianjin, 300052, China

Email: yyc\_dr@yeah.net

Tel/Fax: +86 022-60362255

**Corresponding to:** Deguo Jiang, Department of psychiatry, Wenzhou Seventh People's Hospital, No. 552 East Xishan Road, Ouhai District, Wenzhou, Zhejiang, 325005, China

Email: fengsqing@126.com

Tel/Fax: +86 0577-88209928/88432238

Chuanjun Zhuo and Ronghuan Jiang contributed equally to this work.

## Supplementary information

Figure S1 Details of flow chart.

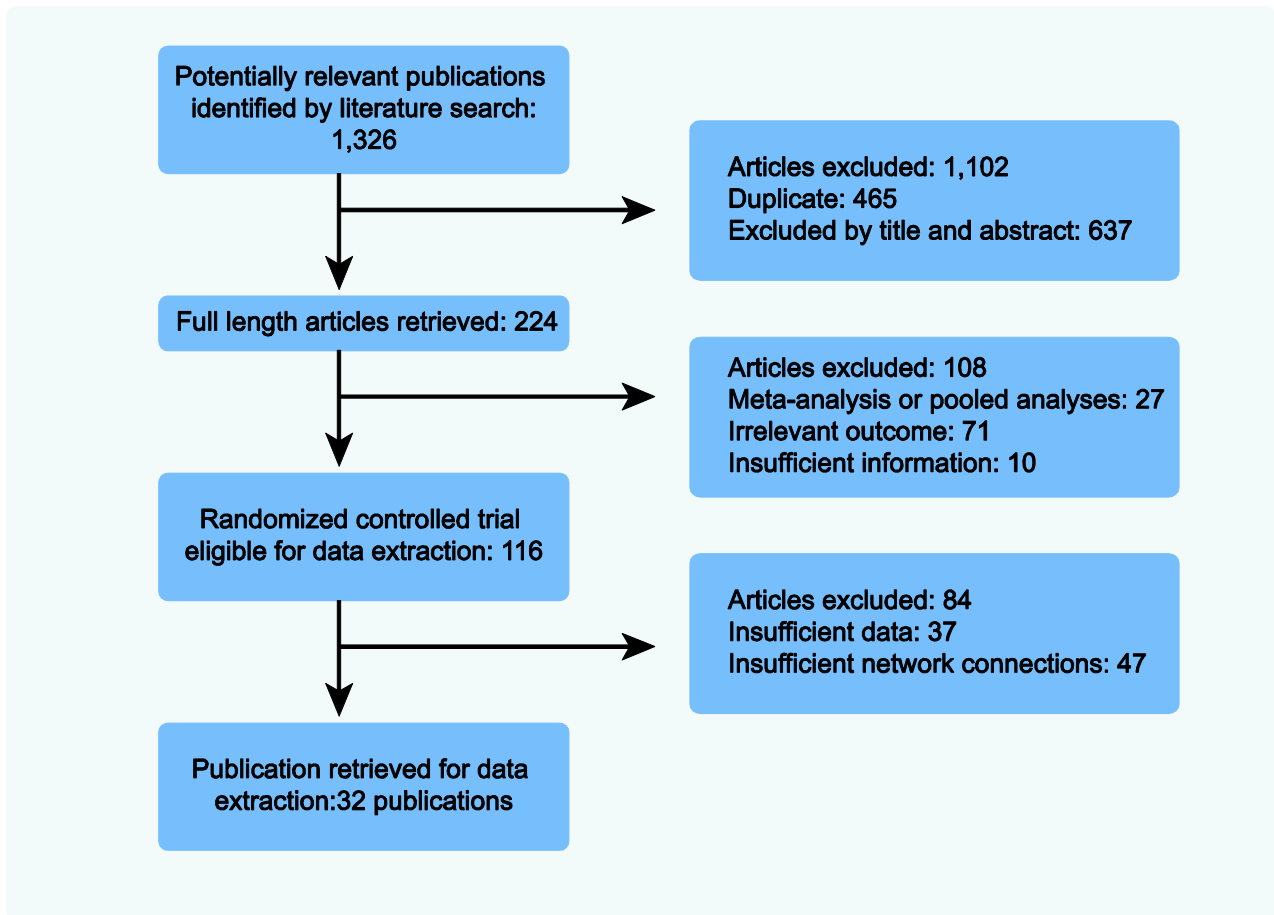

Supplement: 41598_2017_2525_MOESM1_ESM.pdf [file 41598_2017_2525_MOESM1_ESM.pdf]
